# Supplementary material
Source: PubMed Central journal article supplement (PMC3048685)
Supplement: supp_M110.194027_jbc.M110.194027-1.pdf [file supp_M110.194027_jbc.M110.194027-1.pdf]

## Supplementary Figure legends

Figure S1. Coomassie blue staining of histone methyltransferases used in this study. (A) Recombinant human NSD2 Set domain; (B) Recombinant human Ash1 Set domain; (C) Reconstituted *Drosophila* PRC2 complex.

Figure S2. Mass spectra of all peptides listed in Fig. 1C.

Figure S3. MS/MS spectra of all H3 peptides carrying various methylation status at K27 and K36.

Figure S4. (A) H3Kc36me2 and H3Kc36me3 inhibits PRC2 activity; (B) H3Kc27me3 does not affect HYPB's activity; (C) H3K36A mutation reduces PRC2 activity; (D) The Set domain of Ash1 is more closely related to H3K36 methyltransferases like HYPB or Mes4 than H3K4 specific methyltransferase such as Set1 or Trithorax; (E) H3Kc27me3 does not affect Ash1's activity.

A

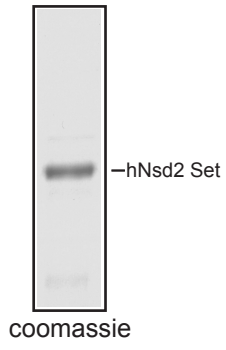

B

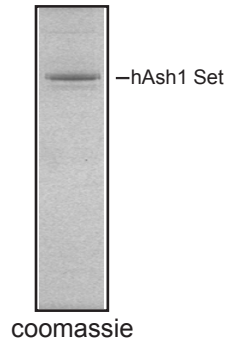

C

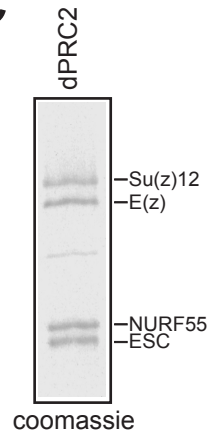

Figure S1

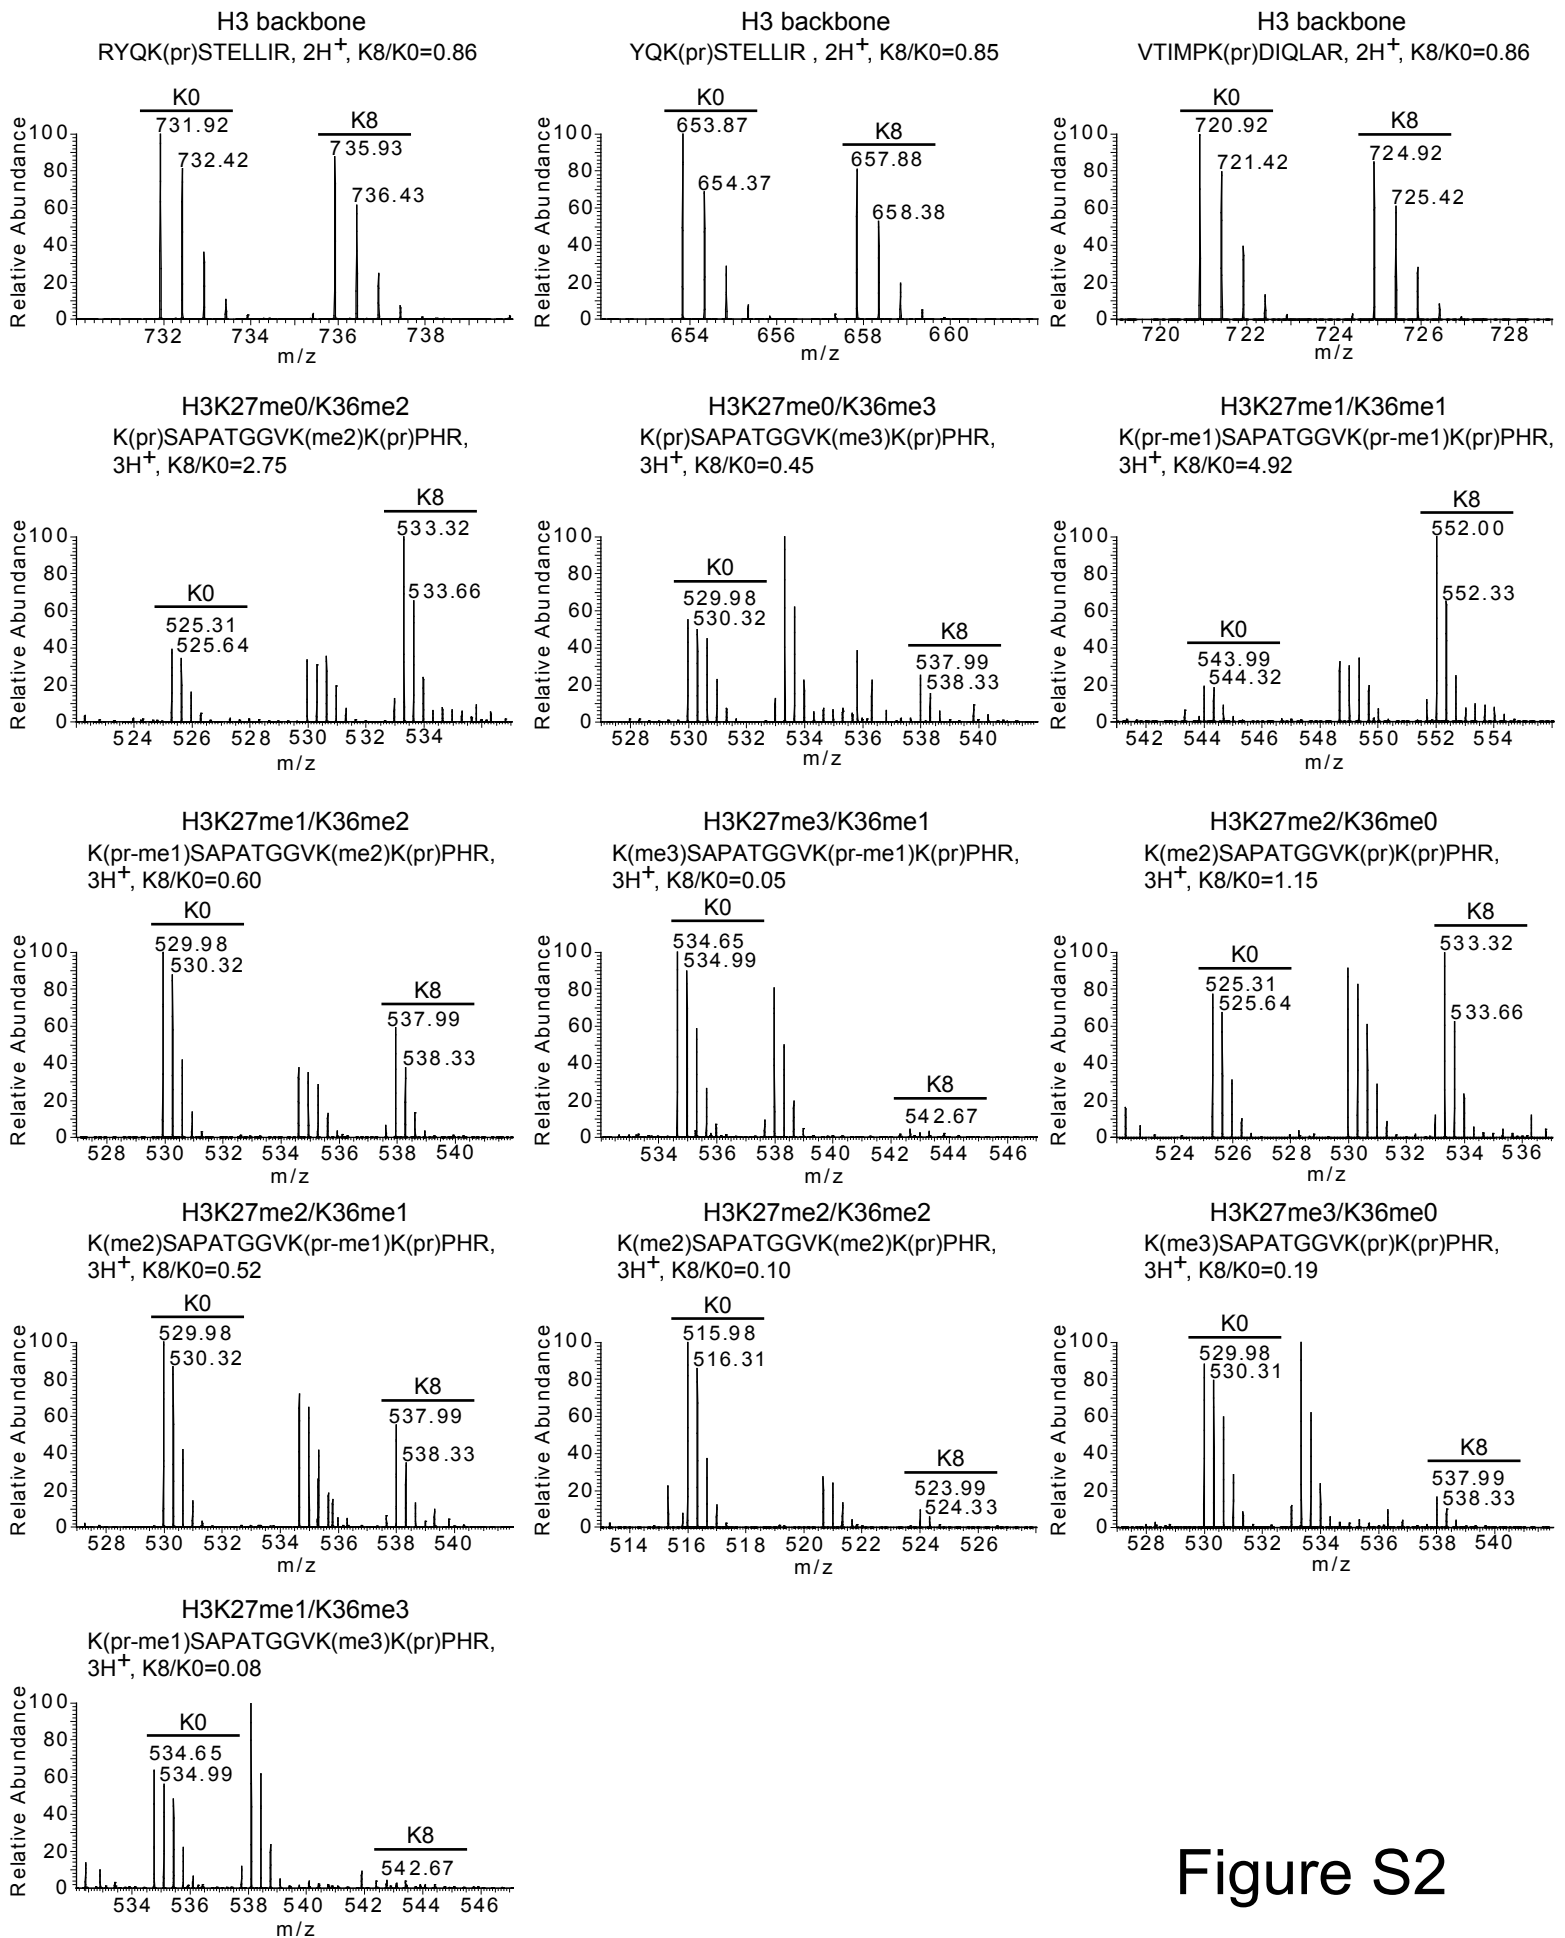

Figure S2

### H3K27me0/K36me0: K(pr)SAPATGGVK(pr)K(pr)PHR, 3H<sup>+</sup>

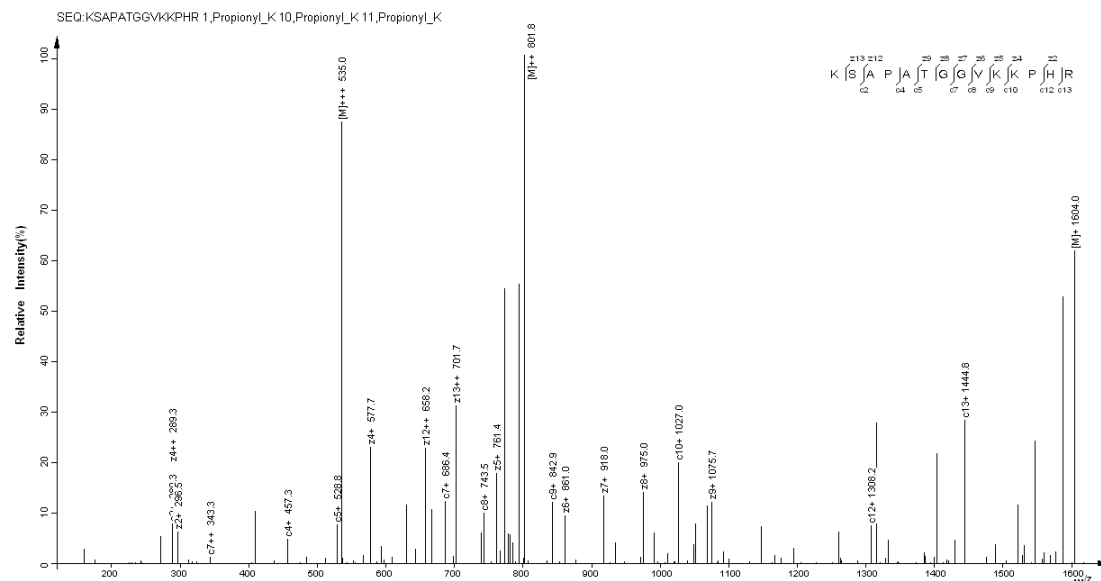

### H3K27me1/K36me0: K(pr-me1)SAPATGGVK(pr)K(pr)PHR, 3H<sup>+</sup>

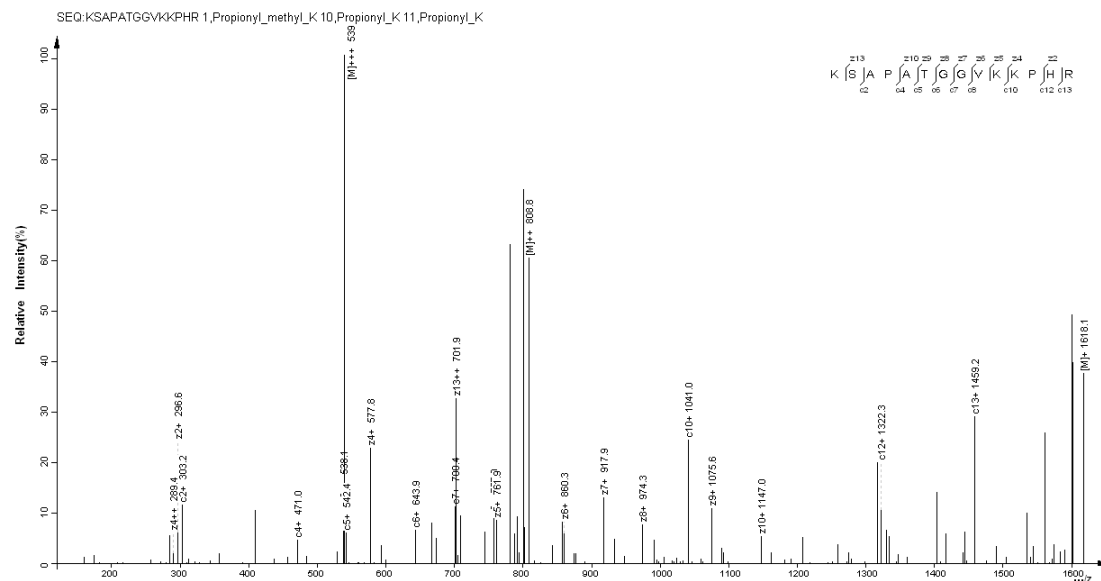

### H3K27me2/K36me0: K(me2)SAPATGGVK(pr)K(pr)PHR, 3H<sup>+</sup>

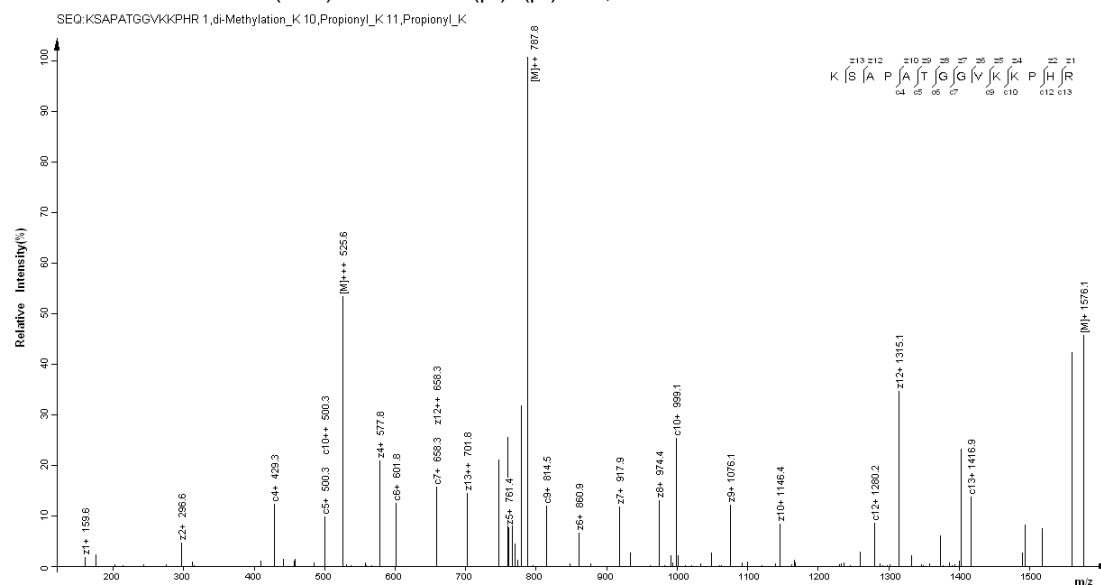

H3K27me3/K36me0: K(me3)SAPATGGVK(pr)K(pr)PHR, 3H<sup>+</sup>

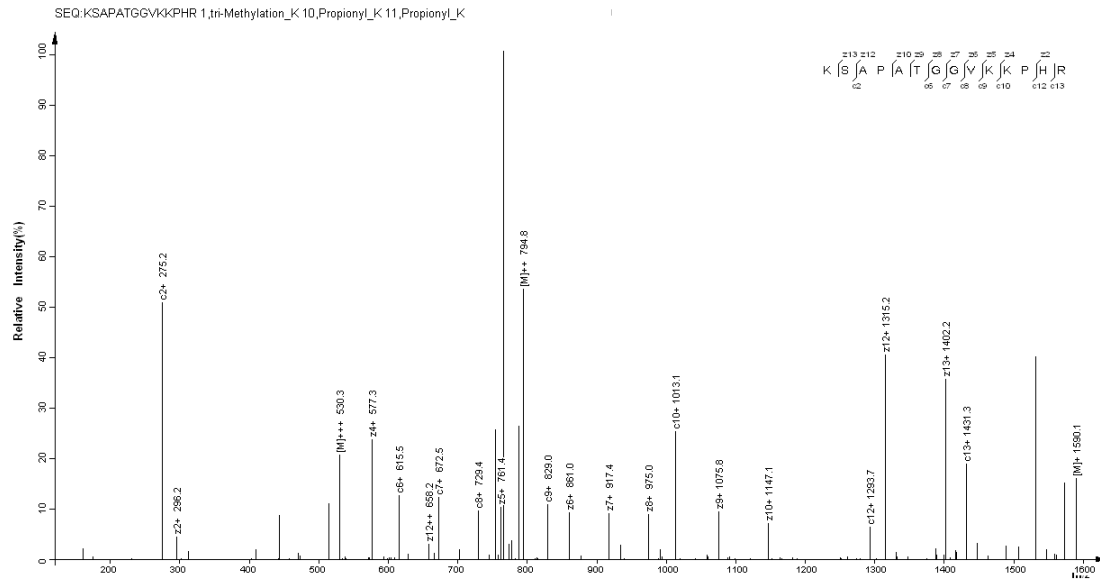

H3K27me0/K36me1: K(pr)SAPATGGVK(pr-me1)K(pr)PHR, 3H<sup>+</sup>

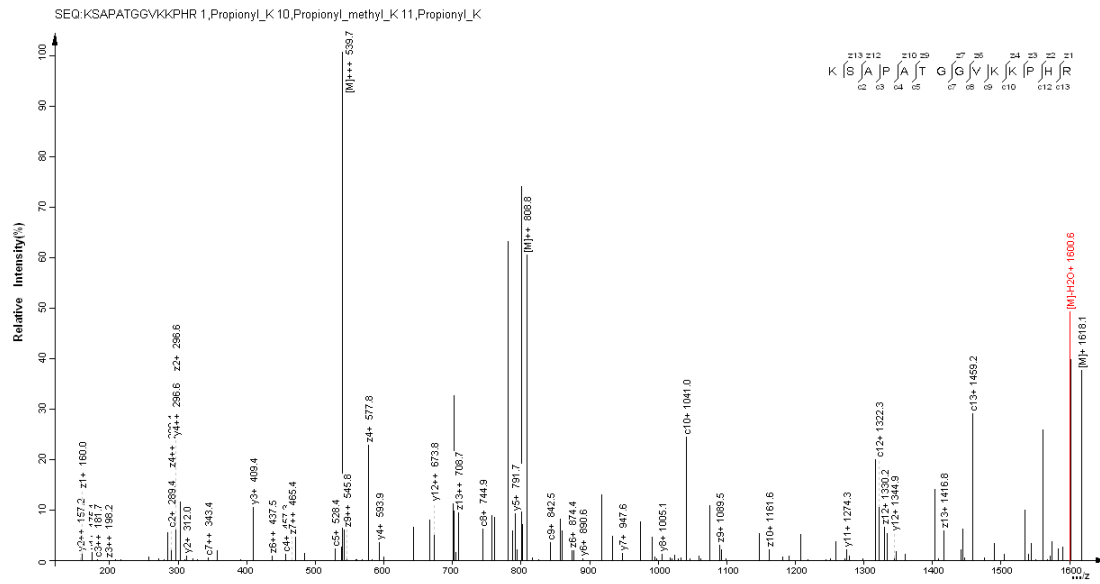

H3K27me1/K36me1: K(pr-me1)SAPATGGVK(pr-me1)K(pr)PHR, 3H<sup>+</sup>

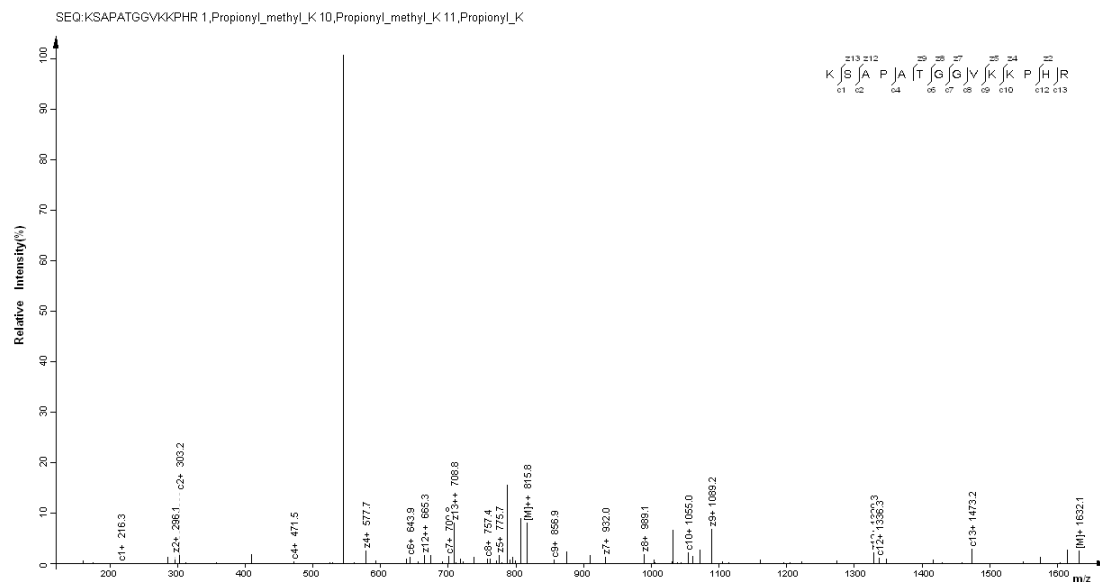

Figure. S3 Page 2

H3K27me2/K36me1: K(me2)SAPATGGVK(pr-me1)K(pr)PHR, 3H<sup>+</sup>

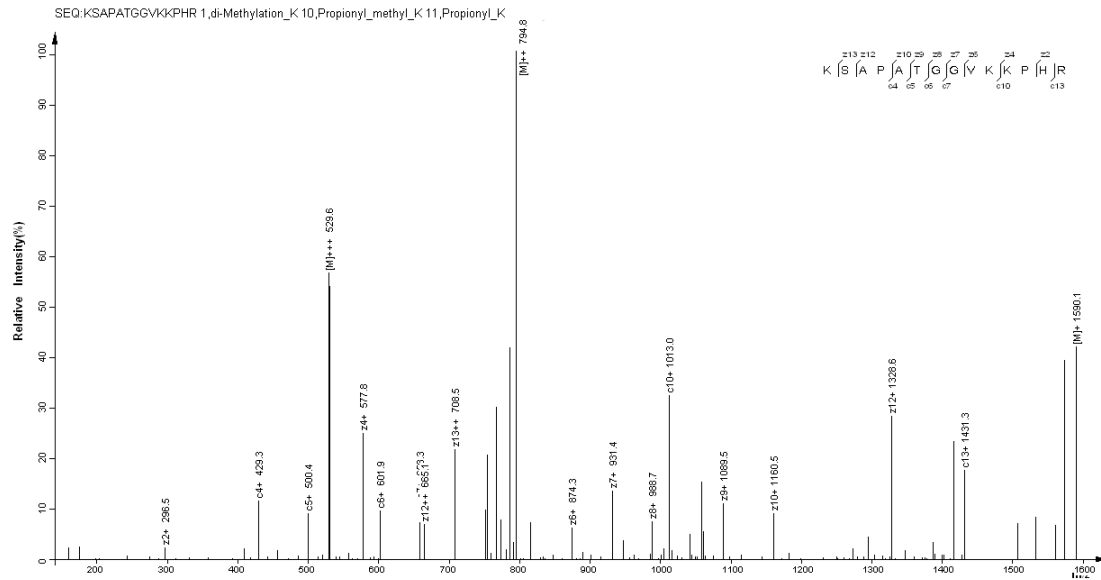

H3K27me3/K36me1: K(me3)SAPATGGVK(pr-me1)K(pr)PHR, 3H<sup>+</sup>

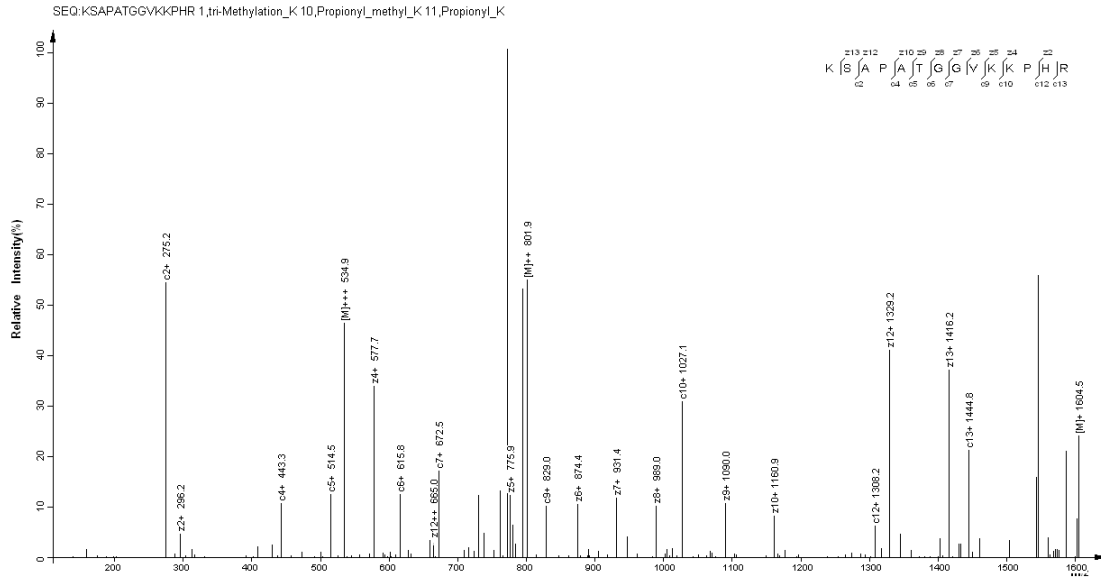

H3K27me0/K36me2: K(pr)SAPATGGVK(me2)K(pr)PHR, 3H<sup>+</sup>

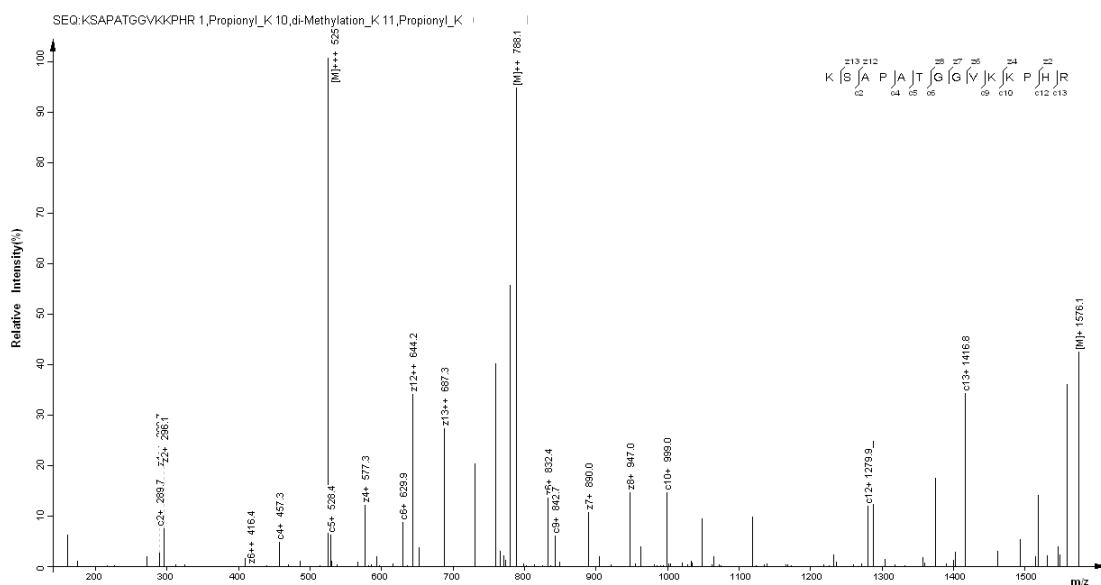

### H3K27me1/K36me2: K(pr-me)SAPATGGVK(me2)K(pr)PHR, 3H<sup>+</sup>

SEQ:KSAPATGGVKKPHR 1,Propionyl\_methyl\_K 10,di-Methylation\_K 11,Propionyl\_K

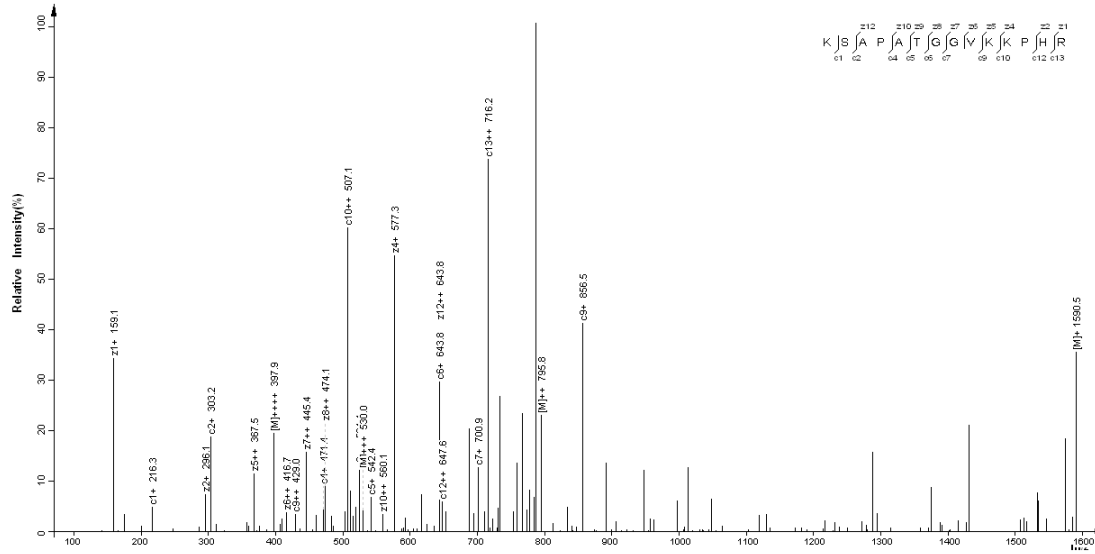

K S A P A T G G V K P H R  
 1 2 3 4 5 6 7 8 9 10 11 12 13

### H3K27me2/K36me2: K(me2)SAPATGGVK(me2)K(pr)PHR, 3H<sup>+</sup>

SEQ:KSAPATGGVKKPHR 1,di-Methylation\_K 10,di-Methylation\_K 11,Propionyl\_K

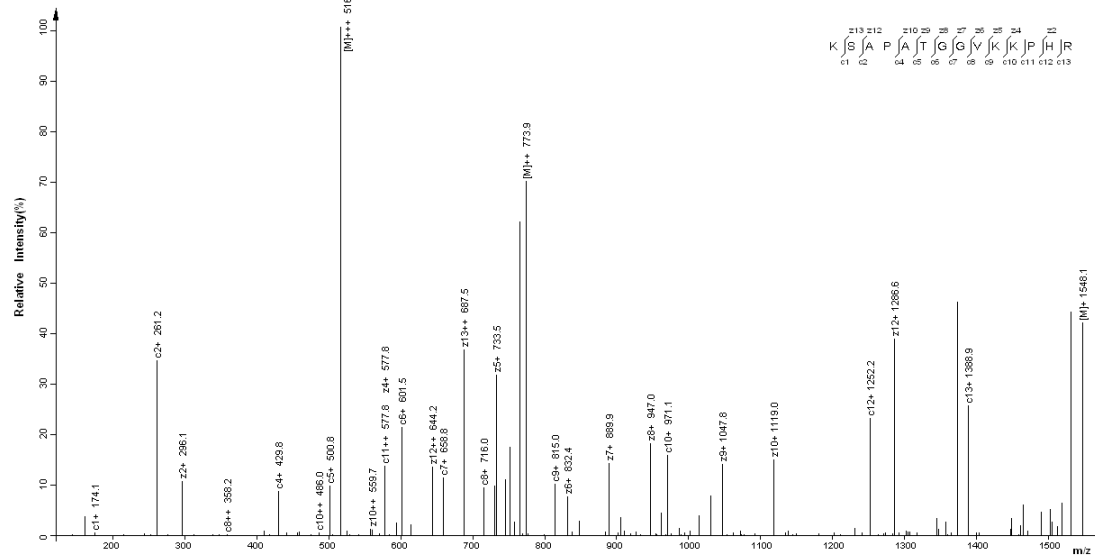

K S A P A T G G V K P H R  
 1 2 3 4 5 6 7 8 9 10 11 12 13

### H3K27me3/K36me2: K(me3)SAPATGGVK(me2)K(pr)PHR, 3H<sup>+</sup>

SEQ:KSAPATGGVKKPHR 1,tri-Methylation\_K 10,di-Methylation\_K 11,Propionyl\_K

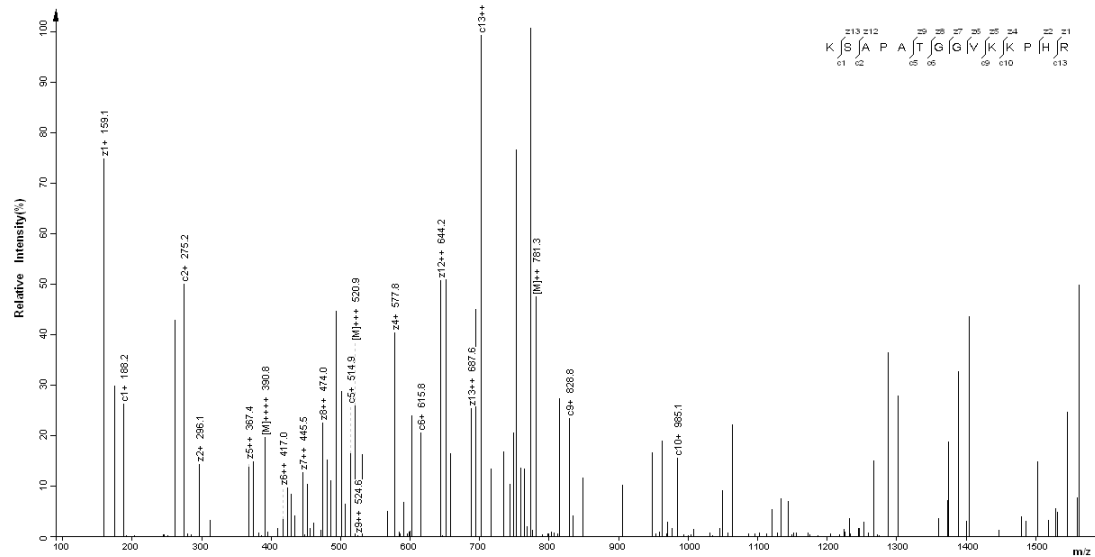

K S A P A T G G V K P H R  
 1 2 3 4 5 6 7 8 9 10 11 12 13

### H3K27me0/K36me3: K(pr)SAPATGGVK(me3)K(pr)PHR, 3H<sup>+</sup>

SEQ:K:SAPATGGVK:K:PHR 1,Propionyl\_K 10,tri-Methylation\_K 11,Propionyl\_K

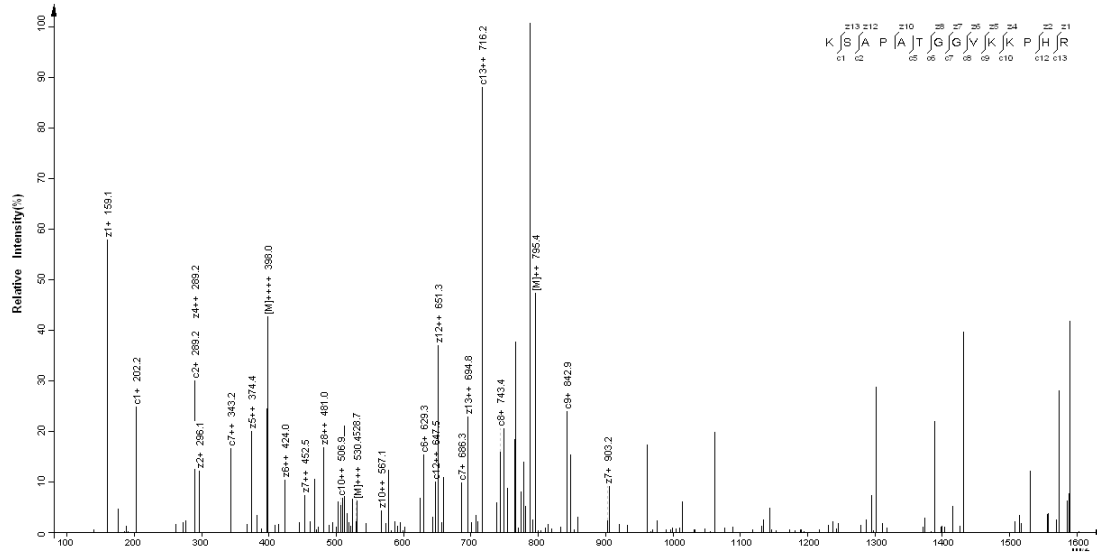

K S A P A T G V K K P H R  
 1 2 3 4 5 6 7 8 9 10 11 12 13

### H3K27me1/K36me3: K(pr-me1)SAPATGGVK(me3)K(pr)PHR, 3H<sup>+</sup>

SEQ:K:SAPATGGVK:K:PHR 1,Propionyl\_methyl\_K 10,tri-Methylation\_K 11,Propionyl\_K

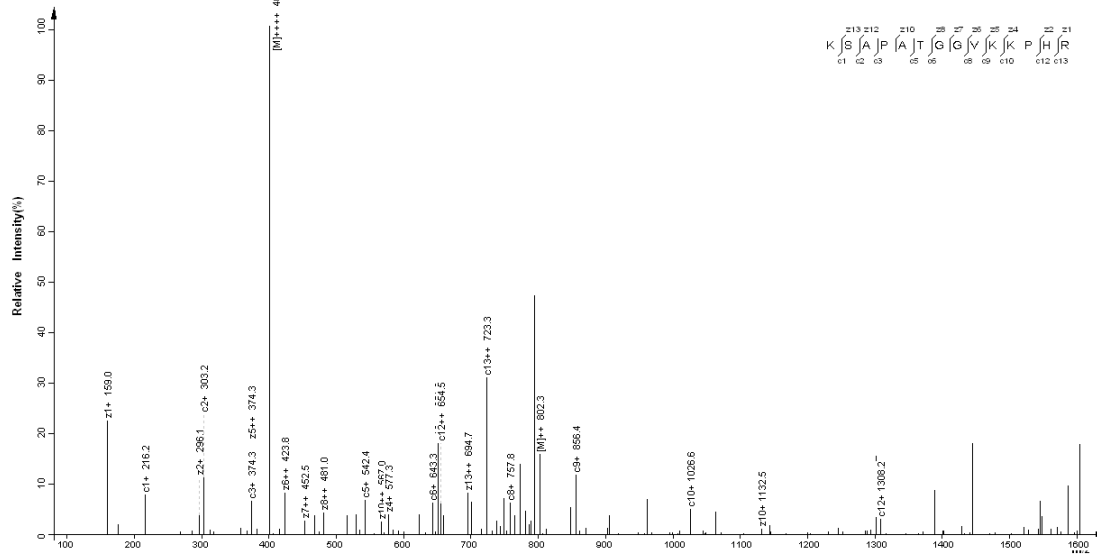

K S A P A T G V K K P H R  
 1 2 3 4 5 6 7 8 9 10 11 12 13

### H3K27me2/K36me3: K(me2)SAPATGGVK(me3)K(pr)PHR, 3H<sup>+</sup>

SEQ:K:SAPATGGVK:K:PHR 1,di-Methylation\_K 10,tri-Methylation\_K 11,Propionyl\_K

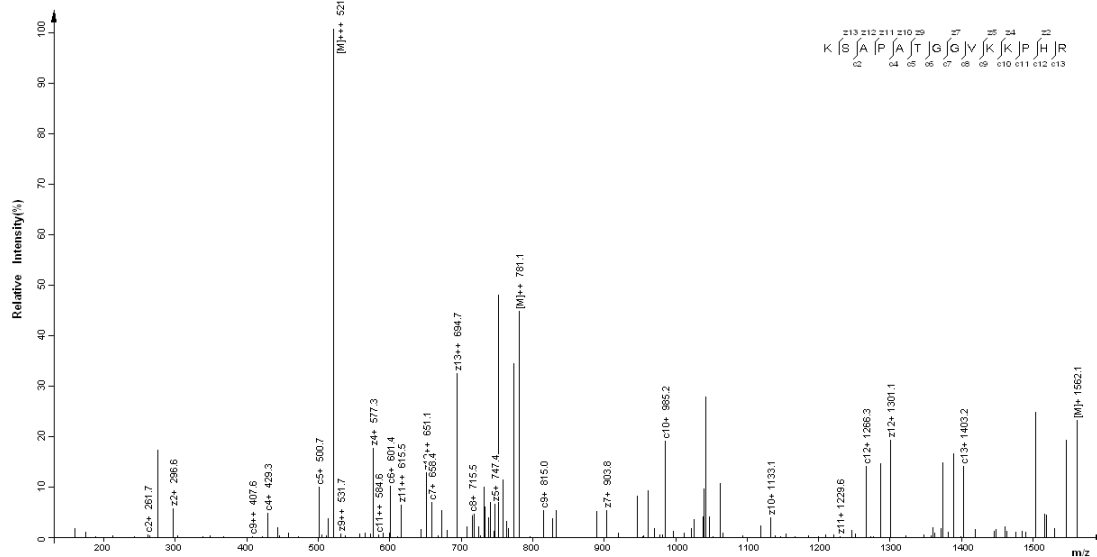

K S A P A T G V K K P H R  
 1 2 3 4 5 6 7 8 9 10 11 12 13

Figure. S3 Page 5



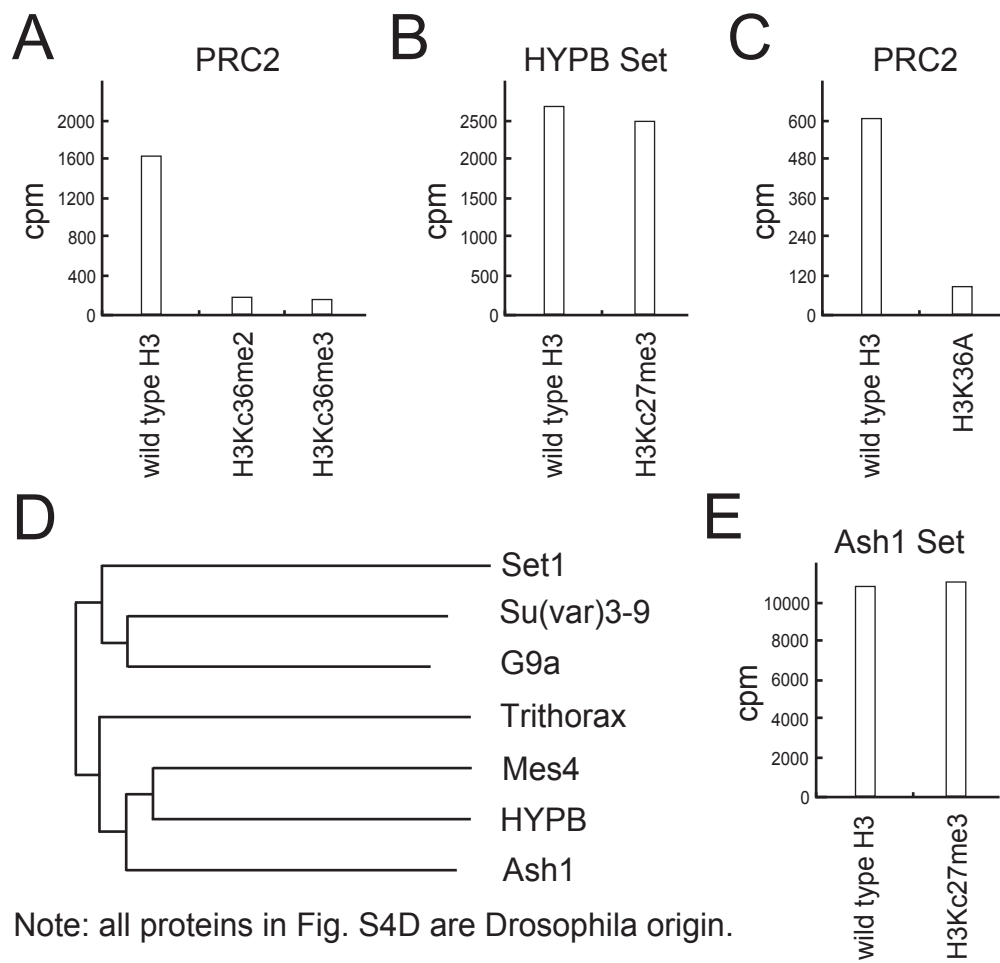

Figure. S4
